# Supplementary material
Source: PubMed Central journal article supplement (PMC3193470)
Supplement: cr2011107x1.pdf [file cr2011107x1.pdf]

**Figure S1**

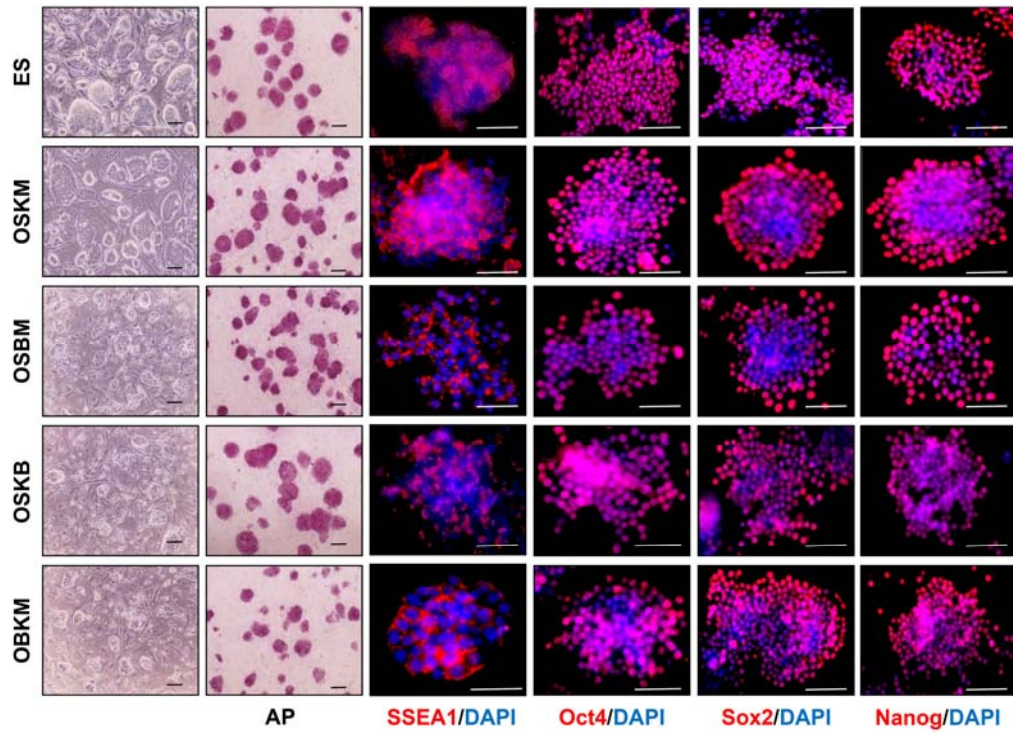

**Supplementary information, Figure S1.** Phase-contrast photographs of cell morphology and immunofluorescence of reprogrammed iPS cells. Mouse ES cells from 129/Ola mice were used as control. Scale bars, 200  $\mu\text{m}$ .
