# Supplementary material
Source: PubMed Central journal article supplement (PMC3193470)
Supplement: cr2011107x3.pdf [file cr2011107x3.pdf]

Figure S3

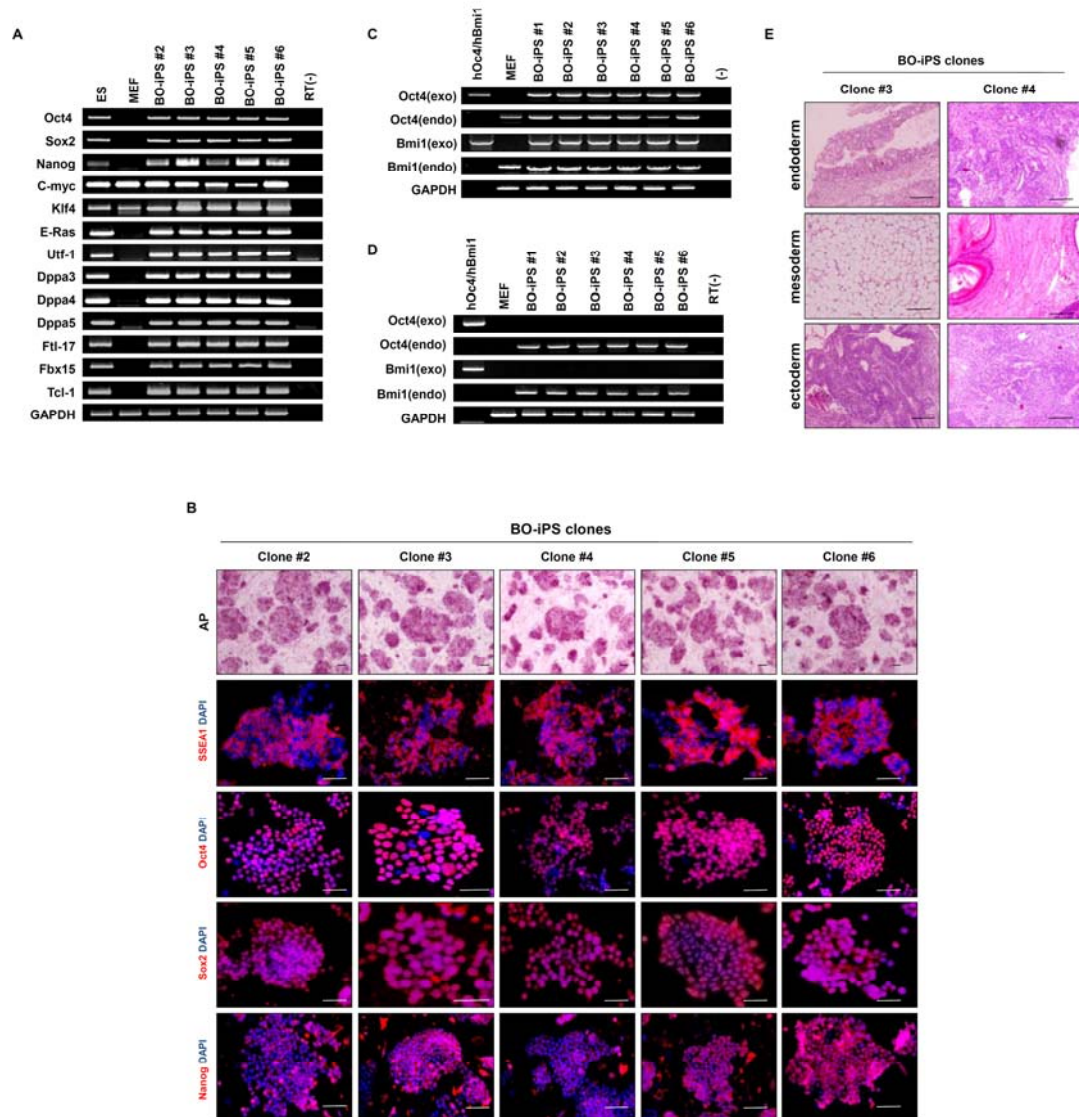

**Supplementary information, Figure S3.** Generation and characterization of BO-iPS clones (1–6) from established BO-iPS cells by single cell culture. **(A)** RT-PCR analysis of ES cell marker genes in mES cells, MEFs, and BO-iPS clones. **(B)** Characterization of BO-iPS clones. AP staining, as well as SSEA1, Oct4, Sox2, and Nanog immunoreactivity, was detected in BO-iPS clones. Scale bars, 200  $\mu$ m. **(C)** PCR of genomic DNA to detect integration of exogenous Oct4 and Bmi1 genes in MEFs and BO-iPS clones. hBmi1/Oct4 was used as positive controls using expression plasmid DNA (pBabe hBmi1 and pBabe hOct4). **(D)** RT-PCR to detect expression of exogenous Oct4 and Bmi1 transcripts in MEFs and BO-iPS clones. **(E)** *In-vivo* developmental potential of BO-iPS clones. Teratomas arising from BO-iPS clones differentiate into epithelium (endoderm, left), muscle and fat (mesoderm, middle), and neural rosettes (ectoderm, right). Hematoxylin and eosin-stained sections of teratomas derived from BO-iPS clones in a nude mouse host after 8-10 weeks are shown. Scale bars, 200  $\mu$ m.
