# Supplementary material
Source: PubMed Central journal article supplement (PMC3193470)
Supplement: cr2011107x8.pdf [file cr2011107x8.pdf]

**Figure S8**

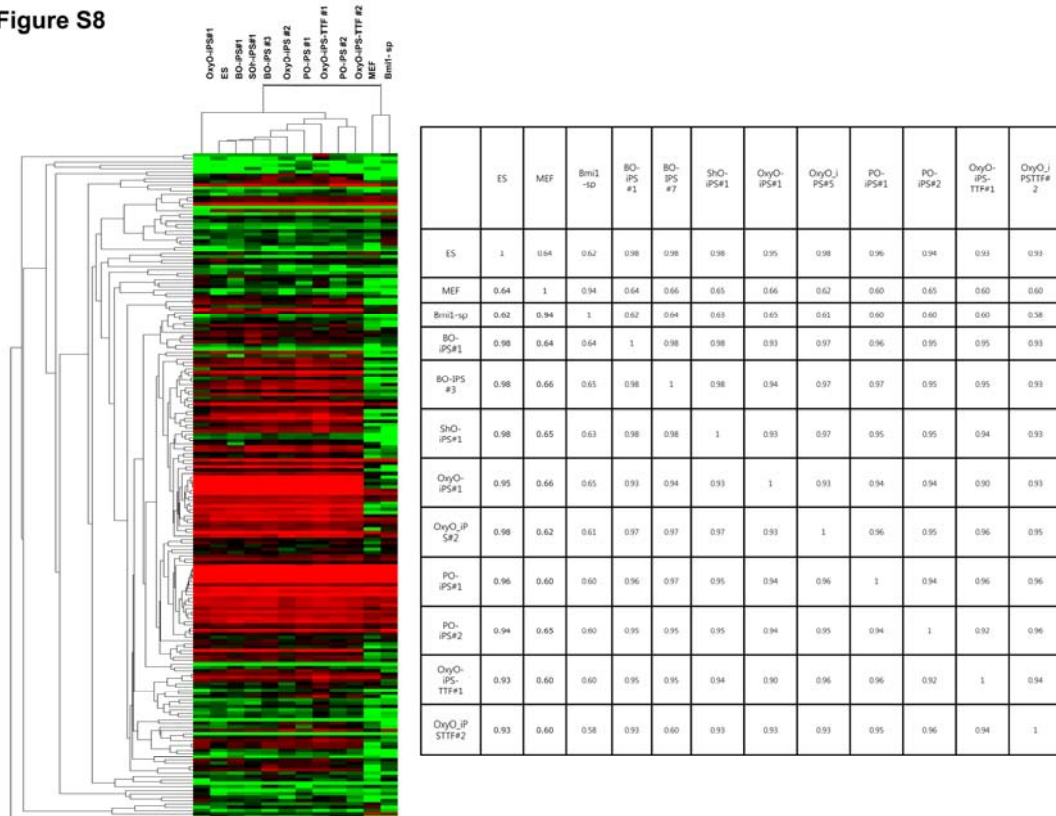

**Supplementary information, Figure S8** Global gene expression analyses by DNA microarray. Heat map and hierarchical cluster analysis of global gene expression in mES, iPS cells, MEF, and Bmi1-sp. These genes are listed in Supplemental information, Table S2. Bmi1 sp mean that MEFs were transduced by Bmi1 and the cultured in the NSC culture condition as described. The gene expression profiles showed that the BO-iPS cell profile was similar mES and was different from MEFs and Bmi1-sp.
