# Supplementary material
Source: PubMed Central journal article supplement (PMC3193470)
Supplement: cr2011107x9.pdf [file cr2011107x9.pdf]

**Figure S9**

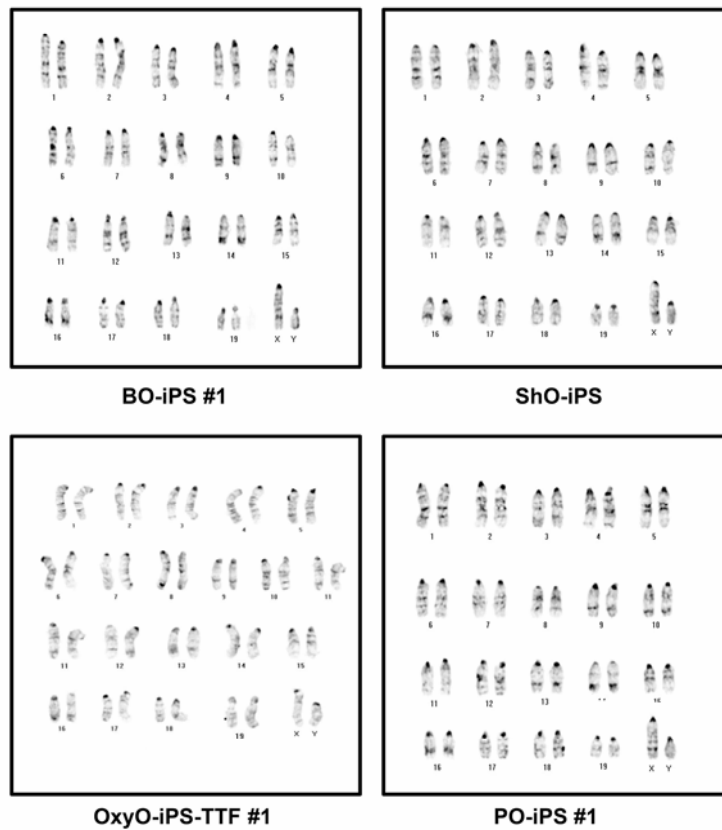

**Supplementary information, Figure S9** Karyotype analysis of iPS cells. The karyotypes of BO-iPS #1, ShO-iPS, OxyO-iPS-TTF #1, and PO-iPS #1 cell cultures at 20–30 passages were analyzed by G-band staining. BO-iPS #1, ShO-iPS, OxyO-iPS-TTF #1, and PO-iPS #1 cells were found to be genetically stable over long-term culture.
