# Supplementary material
Source: PubMed Central journal article supplement (PMC3193470)
Supplement: cr2011107x10.pdf [file cr2011107x10.pdf]

**Supplementary information, Table S1** Population doubling time

|              | Population doubling time (hr) |
|--------------|-------------------------------|
| ES           | 23.5 ± 0.7                    |
| BO-iPS       | 20.7 ± 0.4                    |
| ShO-iPS      | 20.4 ± 0.6                    |
| OxyO-iPS     | 20.2 ± 1.0                    |
| PO-iPS       | 19.8 ± 0.5                    |
| OxyO-iPS-TTF | 21.1 ± 1.6                    |
