# Supplementary material
Source: PubMed Central journal article supplement (PMC3193470)
Supplement: cr2011107x11.pdf [file cr2011107x11.pdf]

**Supplementary information, Table S2.** Genes belonging to groups in Supplementary information, Figure S8

| Genbank      | Description                                                                                                                                                                                                    |
|--------------|----------------------------------------------------------------------------------------------------------------------------------------------------------------------------------------------------------------|
| NM_012054    | Mus musculus acyloxyacyl hydrolase (Aoah), mRNA [NM_012054]                                                                                                                                                    |
| NM_153508    | Mus musculus calyntenin 3 (Clstn3), mRNA [NM_153508]                                                                                                                                                           |
| NM_011305    | Mus musculus retinoid X receptor alpha (Rxra), mRNA [NM_011305]                                                                                                                                                |
| NM_011884    | Mus musculus RNA guanylyltransferase and 5'-phosphatase (Rngtt), mRNA [NM_011884]                                                                                                                              |
| NM_013892    | Mus musculus proprotein convertase subtilisin/kexin type 1 inhibitor (Pcsk1n), mRNA [NM_013892]                                                                                                                |
| NM_008595    | Mus musculus manic fringe homolog ( <i>Drosophila</i> ) (Mfng), mRNA [NM_008595]                                                                                                                               |
| NM_008860    | Mus musculus protein kinase C, zeta (Prkcz), transcript variant 1, mRNA [NM_008860]                                                                                                                            |
| NM_212457    | Mus musculus brain expressed gene 4 (Bex4), mRNA [NM_212457]                                                                                                                                                   |
| NM_009514    | Mus musculus pre-B lymphocyte gene 3 (Vpreb3), mRNA [NM_009514]                                                                                                                                                |
| NM_013924    | Mus musculus activator of basal transcription (Abt1), mRNA [NM_013924]                                                                                                                                         |
| NM_028661    | Mus musculus RIKEN cDNA 1110006G06 gene (1110006G06Rik), mRNA [NM_028661]                                                                                                                                      |
| NM_174992    | Mus musculus cDNA sequence BC004728 (BC004728), transcript variant 1, mRNA [NM_174992]                                                                                                                         |
| NM_026468    | Mus musculus ATP synthase, H <sup>+</sup> transporting, mitochondrial F0 complex, subunit c (subunit 9), isoform 2 (Atp5g2), mRNA [NM_026468]                                                                  |
| NM_009575    | Mus musculus zinc finger protein of the cerebellum 3 (Zic3), mRNA [NM_009575]                                                                                                                                  |
| NM_029649    | Mus musculus transmembrane protein 101 (Tmem101), mRNA [NM_029649]                                                                                                                                             |
| AK004470     | Mus musculus 18-day embryo whole body cDNA, RIKEN full-length enriched library, clone:1190003J15 product:hypothetical Transthyretin/Transthyretin-related containing protein, full insert sequence. [AK004470] |
| NM_053071    | Mus musculus cytochrome c oxidase, subunit VIc (Cox6c), mRNA [NM_053071]                                                                                                                                       |
| NM_026068    | Mus musculus mediator of RNA polymerase II transcription, subunit 31 homolog (yeast) (Med31), mRNA [NM_026068]                                                                                                 |
| NM_001017429 | Mus musculus cytochrome c oxidase, subunit XVII assembly protein homolog (yeast) (Cox17), mRNA [NM_001017429]                                                                                                  |
| NM_133945    | Mus musculus vaccinia related kinase 3 (Vrk3), mRNA [NM_133945]                                                                                                                                                |
| AK019664     | Mus musculus adult male testis cDNA, RIKEN full-length enriched library, clone:4930502N02 product:hypothetical Adenylate kinase/Glutamic acid-rich region containing protein, full insert sequence. [AK019664] |
| NM_019472    | Mus musculus myosin X (Myo10), mRNA [NM_019472]                                                                                                                                                                |
| NM_178739    | Mus musculus WD repeat domain 40B (Wdr40b), mRNA [NM_178739]                                                                                                                                                   |
| NM_008108    | Mus musculus growth differentiation factor 3 (Gdf3), mRNA [NM_008108]                                                                                                                                          |
| NM_144912    | Mus musculus RAD9 homolog B ( <i>S. cerevisiae</i> ) (Rad9b), mRNA [NM_144912]                                                                                                                                 |
| NM_022987    | Mus musculus zinc finger protein of the cerebellum 5 (Zic5), mRNA [NM_022987]                                                                                                                                  |
| NM_013633    | Mus musculus POU domain, class 5, transcription factor 1 (Pou5f1), mRNA [NM_013633]                                                                                                                            |
| NM_008532    | Mus musculus tumor-associated calcium signal transducer 1 (Tacstd1), mRNA [NM_008532]                                                                                                                          |
| NM_013545    | Mus musculus protein tyrosine phosphatase, non-receptor type 6 (Ptpn6), transcript variant 1, mRNA [NM_013545]                                                                                                 |
| NM_013840    | Mus musculus ubiquitously expressed transcript (Uxt), mRNA [NM_013840]                                                                                                                                         |
| NM_021480    | Mus musculus L-threonine dehydrogenase (Tdh), mRNA [NM_021480]                                                                                                                                                 |
| NM_025533    | Mus musculus nitric oxide synthase interacting protein (Nosip), mRNA [NM_025533]                                                                                                                               |

|           |                                                                                                                                                                                                             |
|-----------|-------------------------------------------------------------------------------------------------------------------------------------------------------------------------------------------------------------|
| NM_013924 | Mus musculus activator of basal transcription (Abt1), mRNA [NM_013924]                                                                                                                                      |
| NM_144953 | Mus musculus RIKEN cDNA 1700019D03 gene (1700019D03Rik), mRNA [NM_144953]                                                                                                                                   |
| NM_013840 | Mus musculus ubiquitously expressed transcript (Uxt), mRNA [NM_013840]                                                                                                                                      |
| NM_010361 | Mus musculus glutathione S-transferase, theta 2 (Gstt2), mRNA [NM_010361]                                                                                                                                   |
| NM_153062 | Mus musculus solute carrier family 37 (glycerol-3-phosphate transporter), member 1 (Slc37a1), mRNA [NM_153062]                                                                                              |
| NM_013769 | Mus musculus tight junction protein 3 (Tjp3), mRNA [NM_013769]                                                                                                                                              |
| NM_022024 | Mus musculus glia maturation factor, gamma (Gmfg), transcript variant 1, mRNA [NM_022024]                                                                                                                   |
| NM_008635 | Mus musculus microtubule-associated protein 7 (Mtap7), mRNA [NM_008635]                                                                                                                                     |
| NM_008635 | Mus musculus microtubule-associated protein 7 (Mtap7), mRNA [NM_008635]                                                                                                                                     |
| NM_008860 | Mus musculus protein kinase C, zeta (Prkcz), transcript variant 1, mRNA [NM_008860]                                                                                                                         |
| NM_008860 | Mus musculus protein kinase C, zeta (Prkcz), transcript variant 1, mRNA [NM_008860]                                                                                                                         |
| NM_029554 | Mus musculus RIKEN cDNA 0610040J01 gene (0610040J01Rik), mRNA [NM_029554]                                                                                                                                   |
| NM_007957 | Mus musculus extraembryonic, spermatogenesis, homeobox 1 (Esx1), mRNA [NM_007957]                                                                                                                           |
| NM_007430 | Mus musculus nuclear receptor subfamily 0, group B, member 1 (Nr0b1), mRNA [NM_007430]                                                                                                                      |
| NM_022985 | Mus musculus zinc finger, AN1-type domain 6 (Zfand6), mRNA [NM_022985]                                                                                                                                      |
| NM_134251 | Mus musculus solute carrier family 12 (potassium/chloride transporters), member 8 (Slc12a8), mRNA [NM_134251]                                                                                               |
| NM_013892 | Mus musculus proprotein convertase subtilisin/kexin type 1 inhibitor (Pcsk1n), mRNA [NM_013892]                                                                                                             |
| NM_026468 | Mus musculus ATP synthase, H <sup>+</sup> transporting, mitochondrial F0 complex, subunit c (subunit 9), isoform 2 (Atp5g2), mRNA [NM_026468]                                                               |
| NM_030722 | Mus musculus pumilio 1 ( <i>Drosophila</i> ) (Pum1), mRNA [NM_030722]                                                                                                                                       |
| NM_026301 | Mus musculus ring finger protein 125 (Rnf125), mRNA [NM_026301]                                                                                                                                             |
| NM_026323 | Mus musculus WAP four-disulfide core domain 2 (Wfdc2), mRNA [NM_026323]                                                                                                                                     |
| NM_013924 | Mus musculus activator of basal transcription (Abt1), mRNA [NM_013924]                                                                                                                                      |
| NM_009514 | Mus musculus pre-B lymphocyte gene 3 (Vpreb3), mRNA [NM_009514]                                                                                                                                             |
| NM_011305 | Mus musculus retinoid X receptor alpha (Rxra), mRNA [NM_011305]                                                                                                                                             |
| NM_025838 | Mus musculus RIKEN cDNA 1110004B13 gene (1110004B13Rik), transcript variant 1, mRNA [NM_025838]                                                                                                             |
| NM_172293 | Mus musculus cDNA sequence BC038822 (BC038822), mRNA [NM_172293]                                                                                                                                            |
| NM_008822 | Mus musculus peroxisome biogenesis factor 7 (Pex7), mRNA [NM_008822]                                                                                                                                        |
| NM_009342 | Mus musculus dynein light chain Tctex-type 1 (Dyntl1), mRNA [NM_009342]                                                                                                                                     |
| AK010559  | Mus musculus ES cells cDNA, RIKEN full-length enriched library, clone:2410019P08 product:hypothetical Proline-rich region profile/Zn-finger, C2H2 type containing protein, full insert sequence. [AK010559] |
| NM_011973 | Mus musculus renal tumor antigen (Rage), mRNA [NM_011973]                                                                                                                                                   |
| NM_011973 | Mus musculus renal tumor antigen (Rage), mRNA [NM_011973]                                                                                                                                                   |
| NM_011884 | Mus musculus RNA guanylyltransferase and 5'-phosphatase (Rngtt), mRNA [NM_011884]                                                                                                                           |
| NM_022024 | Mus musculus glia maturation factor, gamma (Gmfg), transcript variant 1, mRNA [NM_022024]                                                                                                                   |
| NM_021099 | Mus musculus kit oncogene (Kit), mRNA [NM_021099]                                                                                                                                                           |
| AK019664  | Mus musculus adult male testis cDNA, RIKEN full-length enriched library, clone:4930502N02 product:hypothetical Adenylate kinase/Glutamic acid-rich region                                                   |

|           |                                                                                                                           |
|-----------|---------------------------------------------------------------------------------------------------------------------------|
|           | containing protein, full insert sequence. [AK019664]                                                                      |
| NM_007507 | Mus musculus ATP synthase, H <sup>+</sup> transporting, mitochondrial F1F0 complex, subunit e (Atp5k), mRNA [NM_007507]   |
| NM_021397 | Mus musculus zinc finger and BTB domain containing 32 (Zbtb32), mRNA [NM_021397]                                          |
| NM_178367 | Mus musculus DEAH (Asp-Glu-Ala-His) box polypeptide 33 (Dhx33), mRNA [NM_178367]                                          |
| NM_172799 | Mus musculus tubulin tyrosine ligase-like family, member 6 (Ttl6), mRNA [NM_172799]                                       |
| NM_139218 | Mus musculus developmental pluripotency-associated 3 (Dppa3), mRNA [NM_139218]                                            |
| NM_019743 | Mus musculus RING1 and YY1 binding protein (Rybp), mRNA [NM_019743]                                                       |
| NM_054085 | Mus musculus alpha-kinase 3 (Alpk3), mRNA [NM_054085]                                                                     |
| NM_029948 | Mus musculus PRAME family member 12 (Pramef12), mRNA [NM_029948]                                                          |
| NM_175238 | Mus musculus Rap1 interacting factor 1 homolog (yeast) (Rif1), mRNA [NM_175238]                                           |
| NM_009556 | Mus musculus zinc finger protein 42 (Zfp42), mRNA [NM_009556]                                                             |
| NM_008955 | Mus musculus reproductive homeobox 6 (Rhox6), mRNA [NM_008955]                                                            |
| NM_015766 | Mus musculus Epstein-Barr virus induced gene 3 (Ebi3), mRNA [NM_015766]                                                   |
| NM_175482 | Mus musculus ubiquitin specific peptidase 28 (Usp28), mRNA [NM_175482]                                                    |
| NM_007866 | Mus musculus delta-like 3 (Drosophila) (Dll3), mRNA [NM_007866]                                                           |
| NM_009236 | Mus musculus SRY-box containing gene 18 (Sox18), mRNA [NM_009236]                                                         |
| NM_028610 | Mus musculus developmental pluripotency associated 4 (Dppa4), transcript variant 1, mRNA [NM_028610]                      |
| NM_026904 | Mus musculus anaphase promoting complex subunit 10 (Anapc10), mRNA [NM_026904]                                            |
| NM_011934 | Mus musculus estrogen related receptor, beta (Esrrb), mRNA [NM_011934]                                                    |
| NM_026904 | Mus musculus anaphase promoting complex subunit 10 (Anapc10), mRNA [NM_026904]                                            |
| NM_023894 | Mus musculus reproductive homeobox 9 (Rhox9), mRNA [NM_023894]                                                            |
| NM_023219 | Mus musculus solute carrier family 5 (neutral amino acid transporters, system A), member 4b (Slc5a4b), mRNA [NM_023219]   |
| NM_172994 | Mus musculus protein phosphatase 2 (formerly 2A), regulatory subunit B (PR 52), gamma isoform (Ppp2r2c), mRNA [NM_172994] |
| NM_031188 | Mus musculus major urinary protein 1 (Mup1), mRNA [NM_031188]                                                             |
| NM_011328 | Mus musculus secretin (Sct), mRNA [NM_011328]                                                                             |
| NM_025274 | Mus musculus developmental pluripotency associated 5 (Dppa5), mRNA [NM_025274]                                            |
| NM_011776 | Mus musculus zona pellucida glycoprotein 3 (Zp3), mRNA [NM_011776]                                                        |
| NM_023755 | Mus musculus transcription factor CP2-like 1 (Tcfcp2l1), mRNA [NM_023755]                                                 |
| NM_028783 | Mus musculus roundabout homolog 4 (Drosophila) (Robo4), mRNA [NM_028783]                                                  |
| NM_172283 | Mus musculus fucokinase (Fuk), transcript variant 1, mRNA [NM_172283]                                                     |
| NM_011635 | Mus musculus tumor rejection antigen P1A (Trap1a), mRNA [NM_011635]                                                       |
| NM_029794 | Mus musculus DNA segment, Chr 11, ERATO Doi 636, expressed (D11Ert636e), transcript variant 2, mRNA [NM_029794]           |
| NM_145464 | Mus musculus SRY-box containing gene 21 (Sox21), mRNA [NM_145464]                                                         |
| NM_007491 | Mus musculus ADP-ribosyltransferase 5 (Art5), mRNA [NM_007491]                                                            |
| NM_175238 | Mus musculus Rap1 interacting factor 1 homolog (yeast) (Rif1), mRNA [NM_175238]                                           |
| NM_023755 | Mus musculus transcription factor CP2-like 1 (Tcfcp2l1), mRNA [NM_023755]                                                 |
| NM_019945 | Mus musculus microtubule associated serine/threonine kinase 1 (Mast1), mRNA [NM_019945]                                   |

|           |                                                                                                                                                                                                                                   |
|-----------|-----------------------------------------------------------------------------------------------------------------------------------------------------------------------------------------------------------------------------------|
| NM_029341 | Mus musculus calcyphosine-like (Capsl), mRNA [NM_029341]                                                                                                                                                                          |
| NM_013873 | Mus musculus sulfotransferase family 4A, member 1 (Sult4a1), mRNA [NM_013873]                                                                                                                                                     |
| NM_023219 | Mus musculus solute carrier family 5 (neutral amino acid transporters, system A), member 4b (Slc5a4b), mRNA [NM_023219]                                                                                                           |
| NM_023219 | Mus musculus solute carrier family 5 (neutral amino acid transporters, system A), member 4b (Slc5a4b), mRNA [NM_023219]                                                                                                           |
| NM_011401 | Mus musculus solute carrier family 2 (facilitated glucose transporter), member 3 (Slc2a3), mRNA [NM_011401]                                                                                                                       |
| NM_178367 | Mus musculus DEAH (Asp-Glu-Ala-His) box polypeptide 33 (Dhx33), mRNA [NM_178367]                                                                                                                                                  |
| NM_008614 | Mus musculus myelin-associated oligodendrocytic basic protein (Mobp), transcript variant 1, mRNA [NM_008614]                                                                                                                      |
| NM_025274 | Mus musculus developmental pluripotency associated 5 (Dppa5), mRNA [NM_025274]                                                                                                                                                    |
| NM_145464 | Mus musculus SRY-box containing gene 21 (Sox21), mRNA [NM_145464]                                                                                                                                                                 |
| NM_010014 | Mus musculus disabled homolog 1 (Drosophila) (Dab1), transcript variant 1, mRNA [NM_010014]                                                                                                                                       |
| NM_009133 | Mus musculus stathmin-like 3 (Stmn3), mRNA [NM_009133]                                                                                                                                                                            |
| NM_009646 | Mus musculus autoimmune regulator (autoimmune polyendocrinopathy candidiasis ectodermal dystrophy) (Aire), mRNA [NM_009646]                                                                                                       |
| NM_010014 | Mus musculus disabled homolog 1 (Drosophila) (Dab1), transcript variant 1, mRNA [NM_010014]                                                                                                                                       |
| NM_024440 | Mus musculus Der1-like domain family, member 3 (Der13), mRNA [NM_024440]                                                                                                                                                          |
| NM_027366 | Mus musculus lymphocyte antigen 6 complex, locus G6E (Ly6g6e), mRNA [NM_027366]                                                                                                                                                   |
| NM_011443 | Mus musculus SRY-box containing gene 2 (Sox2), mRNA [NM_011443]                                                                                                                                                                   |
| NM_175342 | Mus musculus RIKEN cDNA C330003B14 gene (C330003B14Rik), mRNA [NM_175342]                                                                                                                                                         |
| AK028078  | Mus musculus adult male testis cDNA, RIKEN full-length enriched library, clone:1700026H02 product:hypothetical AMP-dependent synthetase and ligase containing protein, full insert sequence [AK028078]                            |
| NM_009556 | Mus musculus zinc finger protein 42 (Zfp42), mRNA [NM_009556]                                                                                                                                                                     |
| XM_356184 | PREDICTED: Mus musculus RIKEN cDNA 1110001D15 gene (1110001D15Rik), mRNA [XM_356184]                                                                                                                                              |
| NM_011776 | Mus musculus zona pellucida glycoprotein 3 (Zp3), mRNA [NM_011776]                                                                                                                                                                |
| NM_144518 | Mus musculus RIKEN cDNA 2900011O08 gene (2900011O08Rik), mRNA [NM_144518]                                                                                                                                                         |
| NM_026480 | Mus musculus RIKEN cDNA 2410146L05 gene (2410146L05Rik), mRNA [NM_026480]                                                                                                                                                         |
| NM_144518 | Mus musculus RIKEN cDNA 2900011O08 gene (2900011O08Rik), mRNA [NM_144518]                                                                                                                                                         |
| NM_019743 | Mus musculus RING1 and YY1 binding protein (Rybp), mRNA [NM_019743]                                                                                                                                                               |
| NM_017461 | Mus musculus septin 1 (Sept1), mRNA [NM_017461]                                                                                                                                                                                   |
| NM_172670 | Mus musculus glycosyltransferase-like 1B (Gylt1b), mRNA [NM_172670]                                                                                                                                                               |
| NM_010262 | Mus musculus gastrulation brain homeobox 2 (Gbx2), mRNA [NM_010262]                                                                                                                                                               |
| NM_009696 | Mus musculus apolipoprotein E (ApoE), mRNA [NM_009696]                                                                                                                                                                            |
| NM_008963 | Mus musculus prostaglandin D2 synthase (brain) (Ptgds), mRNA [NM_008963]                                                                                                                                                          |
| AK011413  | Mus musculus 10 days embryo whole body cDNA, RIKEN full-length enriched library, clone:2610016E04 product:similar to MAJOR URINARY PROTEINS 11 AND 8 (MUP11 AND MUP8) (FRAGMENT) [Mus musculus], full insert sequence. [AK011413] |
| NM_030676 | Mus musculus nuclear receptor subfamily 5, group A, member 2 (Nr5a2), mRNA [NM_030676]                                                                                                                                            |
| NM_010168 | Mus musculus coagulation factor II (F2), mRNA [NM_010168]                                                                                                                                                                         |
| NM_013873 | Mus musculus sulfotransferase family 4A, member 1 (Sult4a1), mRNA [NM_013873]                                                                                                                                                     |

|           |                                                                                                                                                                                               |
|-----------|-----------------------------------------------------------------------------------------------------------------------------------------------------------------------------------------------|
| NM_023508 | Mus musculus phosducin-like 2 (Pdcl2), mRNA [NM_023508]                                                                                                                                       |
| AK006101  | Mus musculus adult male testis cDNA, RIKEN full-length enriched library, clone:1700019A02 product:hypothetical Glutamic acid-rich region containing protein, full insert sequence. [AK006101] |
| NM_022887 | Mus musculus tuberous sclerosis 1 (Tsc1), mRNA [NM_022887]                                                                                                                                    |
| NM_016688 | Mus musculus programmed cell death protein 7 (Pdcd7), mRNA [NM_016688]                                                                                                                        |
| NM_010758 | Mus musculus myelin-associated glycoprotein (Mag), mRNA [NM_010758]                                                                                                                           |
| NM_008564 | Mus musculus minichromosome maintenance deficient 2 mitotin ( <i>S. cerevisiae</i> ) (Mcm2), mRNA [NM_008564]                                                                                 |
| NM_008199 | Mus musculus histocompatibility 2, blastocyst (H2-BI), mRNA [NM_008199]                                                                                                                       |
| NM_178367 | Mus musculus DEAH (Asp-Glu-Ala-His) box polypeptide 33 (Dhx33), mRNA [NM_178367]                                                                                                              |
| NM_008452 | Mus musculus Kruppel-like factor 2 (lung) (Klf2), mRNA [NM_008452]                                                                                                                            |
| NM_009235 | Mus musculus SRY-box containing gene 15 (Sox15), mRNA [NM_009235]                                                                                                                             |
| NM_010094 | Mus musculus left right determination factor 1 (Lefty1), mRNA [NM_010094]                                                                                                                     |
| NM_007919 | Mus musculus elastase 2A (Ela2a), mRNA [NM_007919]                                                                                                                                            |
| NM_029339 | Mus musculus coiled-coil domain containing 101 (Ccdc101), mRNA [NM_029339]                                                                                                                    |
| NM_025503 | Mus musculus RIKEN cDNA 1700029P11 gene (1700029P11Rik), mRNA [NM_025503]                                                                                                                     |
| NM_007741 | Mus musculus procollagen, type IX, alpha 2 (Col9a2), mRNA [NM_007741]                                                                                                                         |
| NM_013584 | Mus musculus leukemia inhibitory factor receptor (Lifr), mRNA [NM_013584]                                                                                                                     |
| NM_019448 | Mus musculus DNA (cytosine-5-)-methyltransferase 3-like (Dnmt3l), mRNA [NM_019448]                                                                                                            |
| NM_013584 | Mus musculus leukemia inhibitory factor receptor (Lifr), mRNA [NM_013584]                                                                                                                     |
| NM_016810 | Mus musculus golgi SNAP receptor complex member 1 (Gosr1), mRNA [NM_016810]                                                                                                                   |
| NM_029360 | Mus musculus transmembrane 4 superfamily member 5 (Tm4sf5), mRNA [NM_029360]                                                                                                                  |
| NM_025781 | Mus musculus transmembrane protein 170 (Tmem170), mRNA [NM_025781]                                                                                                                            |
| NM_008199 | Mus musculus histocompatibility 2, blastocyst (H2-BI), mRNA [NM_008199]                                                                                                                       |
| XM_130488 | PREDICTED: Mus musculus RIKEN cDNA A530057A03 gene (A530057A03Rik), mRNA [XM_130488]                                                                                                          |
| NM_022887 | Mus musculus tuberous sclerosis 1 (Tsc1), mRNA [NM_022887]                                                                                                                                    |
| NM_008199 | Mus musculus histocompatibility 2, blastocyst (H2-BI), mRNA [NM_008199]                                                                                                                       |
| NM_016810 | Mus musculus golgi SNAP receptor complex member 1 (Gosr1), mRNA [NM_016810]                                                                                                                   |
| NM_013584 | Mus musculus leukemia inhibitory factor receptor (Lifr), mRNA [NM_013584]                                                                                                                     |
| NM_173383 | Mus musculus dead end homolog 1 (zebrafish) (Dnd1), mRNA [NM_173383]                                                                                                                          |
| NM_025995 | Mus musculus F-box protein 5 (Fbxo5), mRNA [NM_025995]                                                                                                                                        |
| NM_027622 | Mus musculus RIKEN cDNA 4921530G04 gene (4921530G04Rik), mRNA [NM_027622]                                                                                                                     |
| NM_178367 | Mus musculus DEAH (Asp-Glu-Ala-His) box polypeptide 33 (Dhx33), mRNA [NM_178367]                                                                                                              |
| AK016694  | Mus musculus adult male testis cDNA, RIKEN full-length enriched library, clone:4933406J07 product:hypothetical protein, full insert sequence. [AK016694]                                      |
| NM_020572 | Mus musculus aurora kinase C (Aurkc), mRNA [NM_020572]                                                                                                                                        |
| NM_026115 | Mus musculus histone aminotransferase 1 (Hat1), mRNA [NM_026115]                                                                                                                              |
| NM_133686 | Mus musculus quinolinate phosphoribosyltransferase (Qprt), mRNA [NM_133686]                                                                                                                   |
| NM_009989 | Mus musculus cytochrome c, testis (Cycct), mRNA [NM_009989]                                                                                                                                   |
| NM_022887 | Mus musculus tuberous sclerosis 1 (Tsc1), mRNA [NM_022887]                                                                                                                                    |

|              |                                                                                                                                                      |
|--------------|------------------------------------------------------------------------------------------------------------------------------------------------------|
| NM_001005223 | Mus musculus zinc finger, HIT type 3 (Znhit3), mRNA [NM_001005223]                                                                                   |
| NM_001002894 | Mus musculus NLR family, pyrin domain containing 14 (Nlrp14), mRNA [NM_001002894]                                                                    |
| NM_011060    | Mus musculus peptidyl arginine deiminase, type III (Padi3), mRNA [NM_011060]                                                                         |
| NM_028937    | Mus musculus spermatogenesis and oogenesis specific basic helix-loop-helix 2 (Sohlh2), mRNA [NM_028937]                                              |
| NM_007493    | Mus musculus asialoglycoprotein receptor 2 (Asgr2), mRNA [NM_007493]                                                                                 |
| NM_173756    | Mus musculus RIKEN cDNA 5830457H20 gene (5830457H20Rik), mRNA [NM_173756]                                                                            |
| NM_172558    | Mus musculus gem (nuclear organelle) associated protein 5 (Gemin5), mRNA [NM_172558]                                                                 |
| NM_183142    | Mus musculus asparagine-linked glycosylation 11 homolog (yeast, alpha-1,2-mannosyltransferase) (Alg11), mRNA [NM_183142]                             |
| NM_013584    | Mus musculus leukemia inhibitory factor receptor (Lifr), mRNA [NM_013584]                                                                            |
| AK014173     | Mus musculus 13 days embryo head cDNA, RIKEN full-length enriched library, clone:3110043L15 product:unclassifiable, full insert sequence. [AK014173] |
| NM_009482    | Mus musculus undifferentiated embryonic cell transcription factor 1 (Utf1), mRNA [NM_009482]                                                         |
| NM_133204    | Mus musculus zinc finger protein 371 (Zfp371), mRNA [NM_133204]                                                                                      |
| NM_009852    | Mus musculus CD6 antigen (Cd6), transcript variant 2, mRNA [NM_009852]                                                                               |
| NM_010758    | Mus musculus myelin-associated glycoprotein (Mag), mRNA [NM_010758]                                                                                  |
| NM_008452    | Mus musculus Kruppel-like factor 2 (lung) (Klf2), mRNA [NM_008452]                                                                                   |
| NM_020572    | Mus musculus aurora kinase C (Aurkc), mRNA [NM_020572]                                                                                               |
| NM_008988    | Mus musculus putative neuronal cell adhesion molecule (Punc), mRNA [NM_008988]                                                                       |
| NM_023587    | Mus musculus protein tyrosine phosphatase-like (proline instead of catalytic arginine), member b (Ptplb), mRNA [NM_023587]                           |
| NM_010637    | Mus musculus Kruppel-like factor 4 (gut) (Klf4), mRNA [NM_010637]                                                                                    |
| NM_019981    | Mus musculus testis expressed gene 101 (Tex101), mRNA [NM_019981]                                                                                    |
| NM_009337    | Mus musculus T-cell lymphoma breakpoint 1 (Tcl1), mRNA [NM_009337]                                                                                   |
| NM_007872    | Mus musculus DNA methyltransferase 3A (Dnmt3a), transcript variant 1, mRNA [NM_007872]                                                               |
| NM_145993    | Mus musculus l(3)mbt-like 2 (Drosophila) (L3mbtl2), mRNA [NM_145993]                                                                                 |
| NM_018776    | Mus musculus cytokine receptor-like factor 3 (Crlf3), mRNA [NM_018776]                                                                               |
| NM_177700    | Mus musculus cDNA sequence BC060631 (BC060631), mRNA [NM_177700]                                                                                     |
| NM_007872    | Mus musculus DNA methyltransferase 3A (Dnmt3a), transcript variant 1, mRNA [NM_007872]                                                               |
| NM_175138    | Mus musculus dynein, axonemal, intermediate chain 1 (Dnaic1), mRNA [NM_175138]                                                                       |
| NM_177700    | Mus musculus cDNA sequence BC060631 (BC060631), mRNA [NM_177700]                                                                                     |
| NM_018776    | Mus musculus cytokine receptor-like factor 3 (Crlf3), mRNA [NM_018776]                                                                               |
| NM_145993    | Mus musculus l(3)mbt-like 2 (Drosophila) (L3mbtl2), mRNA [NM_145993]                                                                                 |
