# Supplementary material
Source: PubMed Central journal article supplement (PMC3193470)
Supplement: cr2011107x12.pdf [file cr2011107x12.pdf]

**Supplementary information, Table S3 Primers used in this study**

| Gene        | Accession No. | Primer Sequence            | Product Size (bp) | Annealing Temp.( °C) |
|-------------|---------------|----------------------------|-------------------|----------------------|
| Oct4 (Endo) | NM_013633     | GAACAGTTTGCCAAGCTGCTG      | 406               | 58                   |
|             |               | CCGGTTACAGAACCATACTCG      |                   |                      |
| Oct4 (Exo)  | NM_203289     | GACAACAATGAGAACCCTTCAGGAGA | 196               | 62                   |
|             |               | TTCTGGCGCCGGTTACAGAACCA    |                   |                      |
| Nanog       | NM_028016     | AGGACAGGTTTCAGAAGCAGAAGT   | 165               | 62                   |
|             |               | TCAGACCATTGCTAGTCTTCAACC   |                   |                      |
| GAPDH       | XM_001473623  | ACTTCAACAGCAACTCCCCTC      | 286               | 62                   |
|             |               | TAGGCCCTCCTGTTATTATGG      |                   |                      |
| SOX2        | NM_177753     | GCGGTGCTTTACGATACGTTG      | 124               | 62                   |
|             |               | CCGAACATCAGAACCAGCT        |                   |                      |
| REX1        | NM_009556     | CAAGAAGAAGCTGAGGGGTAAA     | 314               | 62                   |
|             |               | CGTGGGTTAGGATGTGAATCTT     |                   |                      |
| SAL4        | NM_175303     | GTTAGATGTCAAGGCCAAGGAC     | 320               | 62                   |
|             |               | GGCGTCTACAGTAGACTCGAT      |                   |                      |
| E-RAS       | NM_181548     | CATGACCCCACTATCCAAGATT     | 395               | 62                   |
|             |               | CTCTGAATCTCATGGACAAGCA     |                   |                      |
| KLF4        | NM_010637     | ATCAGTGTTAGCAAAGGAAGCC     | 380               | 62                   |
|             |               | TCTTGATAATGGAGAGAGGGGA     |                   |                      |
| C-MYC       | NM_010849     | CAGCCCTATTCATCTGCGA        | 359               | 62                   |
|             |               | AAACCGCTCCACATACAGTCCT     |                   |                      |
| FBX15       | NM_015798     | AAGCATAATGGGCTCAGACACT     | 368               | 62                   |
|             |               | AACTCACATACCAGATGGGCTT     |                   |                      |
| Bmi1 (Endo) | NM_007552     | CTTACGATGCCAGCAGCAA        | 329               | 62                   |
|             |               | ACAGGAAGAGTGGAGGGAACA      |                   |                      |
| Bmi1 (Exo)  | NM_005180     | ACTTACGATGCCAGCAGC         | 172               | 58                   |
|             |               | GGACCATTCCTTCTCCAGGT       |                   |                      |
| Utf-1       | NM_009482     | CAGATTCAGTTCTTCCACGACG     | 264               | 62                   |
|             |               | ACTGTTGAGATGTCGCCCAA       |                   |                      |
| Dppa4       | XM_001473768  | TATGAGGAAGTCAGCACCACC      | 270               | 62                   |
|             |               | AAGCAGGAAGAGGGCAATG        |                   |                      |
| Dppa5       | XR_004662     | GTATTCCAGGTCCAGTCGCT       | 182               | 62                   |
|             |               | AGCATCCATTTAGCCCGA         |                   |                      |
| Ftl-17      | XM_001476385  | GACCAAGTCACACAACCTGCCA     | 284               | 62                   |
|             |               | GCCGCTCATCTCCTTCAA         |                   |                      |
| GATA4       | NM_008092     | AACCAGAAAACGGAAGCCCAAG     | 381               | 62                   |
|             |               | TACGCGGTGATTATGTCCCAT      |                   |                      |
| SOX7        | NM_011446     | AACACGCTGCCTGAGAAAAACG     | 400               | 62                   |
|             |               | AATAGGCTGGAGATGGGGGACA     |                   |                      |
| MIXL1       | NM_013729     | TGTACCCAGACATCCACTTGCG     | 335               | 62                   |
|             |               | CCAGGAGTCCAACCTTGGAGCCA    |                   |                      |
| Foxa2       | NM_010446     | TACACACACGCCAAACCTCCCT     | 335               | 62                   |
|             |               | GCTTCCTTCAGTGCCAGTTGCT     |                   |                      |
| CER1        | NM_009887     | AGGCAGAAGACAAGCCGATCT      | 379               | 62                   |
|             |               | TCTTCATGGGCAATGGTCTGGT     |                   |                      |
| Brachyury   | NM_009309     | CCCCTGCTGAAGGTAATGTG       | 363               | 62                   |
|             |               | ATGAACTGGGTCTCGGGAAAGC     |                   |                      |
| FLT-1       | NM_010228     | TACGAAAAGTCCGTGTCTTCGC     | 432               | 62                   |
|             |               | TTCAGGTCTCTCCTTCGGCT       |                   |                      |
| CAD11       | N09866        | AAGACCCAGATGCTGCCAACAG     | 387               | 62                   |
|             |               | GCATGATTCAGGGGGTAGGCT      |                   |                      |
| KDR         | NM_010612     | TTTCCTGGGACTGTGGCGAA       | 283               | 62                   |
|             |               | TGGACTCAATGGGCCTTCCA       |                   |                      |
| SOX1        | NM_009233     | CACATGAAGGAACACCCGGA       | 236               | 62                   |
|             |               | TTAGCCCAGCCGTTGACATG       |                   |                      |
| Nefl        | NM_010910     | CGGAAGACGCCACTAACGAGAA     | 387               | 62                   |
|             |               | CTTCGGCGTTCTGCATGTTCTT     |                   |                      |
| P16         | NM_001040654  | AGTCCGCTGCAGACAGACTG       | 115               | 59                   |

|        |           |                        |     |    |
|--------|-----------|------------------------|-----|----|
|        |           | GGGTACGACCGAAAGAGTTCG  |     |    |
| P19    | NM_009877 | CTTGGTCACTGTGAGGATTC   | 190 | 59 |
|        |           | CCATCATCATCACCTGGTCCAG |     |    |
| Nestin | NM_016701 | GGCATCCCTGAATTACCCAA   | 248 | 62 |
|        |           | AGCTCATGGGCATCTGTCAA   |     |    |
| STAT3  | NM_213660 | GTGTCAGATCACATGGGCTAAA | 409 | 62 |
|        |           | ATGTCGGGGTAGAGGTAGACAA |     |    |
| Dppa3  | XM_885629 | AGAGGACGCTTTGGATGA     | 227 | 62 |
|        |           | CTTTCAGCACCGACAACA     |     |    |
| Tcl-1  | NM_009337 | TGCCCGTAGTCATCAAGA     | 233 | 62 |
|        |           | CCGAGTCTATCAGTTCAAGC   |     |    |
| Gli1   | NM_008130 | GCAGGTCATCCTTGCTGTGA   | 165 | 62 |
|        |           | GCTTGCTTTCATCTTTGTCCGC |     |    |

| Gene            | Primer Sequence              |
|-----------------|------------------------------|
| ChIP-Sox2       | CATTGGAGAGGTTCAGACTA         |
|                 | CTGCCCCAGGTTCTCCTTAAG        |
| ChIP-Oct4       | ATCCGAGCAACTGGTTTGTG         |
|                 | CAATCCCACCCTCTAGCCTT         |
| ChIP-Nanog      | TCTTTAGATCAGAGGATGCCCCCTAAGC |
|                 | AAGCCTCCTACCCTACCCACCCCTAT   |
| ChIP-β-actin    | TCGATATCCACGTGACATCCA        |
|                 | GCAGCATTITTTTACCCCTC         |
| Bisulfite-Nanog | TCGATATCCACGTGACATCCA        |
|                 | ACCAAAAAAACCACACTCATATCAAT   |
| Bisulfite-Oct4  | GGTTTTTITAGAGGATGGTTGAGTG    |
|                 | TCCAACCCTACTAACCATCACC       |
