# Supplementary material
Source: PubMed Central journal article supplement (PMC3193470)
Supplement: cr2011107x14.pdf [file cr2011107x14.pdf]

**Supplementary information, Table S4** Antibodies and dilutions used in this study

| Antibody             | Company        | Host   | Dilution Factor |
|----------------------|----------------|--------|-----------------|
| Oct4                 | Santa Cruz     | Mouse  | 1:100/1:500     |
| Sox2                 | Novus          | Rabbit | 1:200/1:500     |
| c-Myc                | Santa Cruz     | Rabbit | 1:200           |
| Klf4                 | Novus          | Mouse  | 1:1,000         |
| Nanog                | R&D systems    | Goat   | 1:200/1:100     |
| Bmi1                 | Santa Cruz     | Goat   | 1:1,000         |
| p16 <sup>Ink4a</sup> | Santa Cruz     | Mouse  | 1:100           |
| p19 <sup>Arf</sup>   | Novus          | Rabbit | 1:500           |
| N-Myc                | Cell Signaling | Rabbit | 1:1,000         |
| SSEA1                | Chemicon       | Mouse  | 1:100           |
| Tuj1                 | Covance        | Mouse  | 1:400           |
| O4                   | Chemicon       | Mouse  | 1:500           |
| GFAP                 | DAKO           | Rabbit | 1:400           |
| Nestin               | Chemicon       | Mouse  | 1:100           |
| Bry                  | Abcam          | Rabbit | 1:100           |
| SMA                  | Sigma          | Mouse  | 1:100           |
| GATA4                | Santa Cruz     | Rabbit | 1:100           |
| $\beta$ -actin       | Sigma          | Rabbit | 1:10,000        |
